# Supplementary material for: Facile synthesis of chitosan membranes for visible-light-driven photocatalytic degradation of tetracycline hydrochloride
Source: Royal Society of Chemistry journal article supplement (doi:10.1039/d0ra08358e), 2020-01-01
Supplement: d0ra08358e1.pdf [file d0ra08358e1.pdf]

## Electronic Supplementary Materials

### Facile synthesis of Chitosan membranes for visible-light-driven photocatalytic degradation of tetracycline hydrochloride

Huimin Liang,<sup>a</sup> Caizhi Lv,<sup>a</sup> Hanjiao Chen,<sup>a</sup> Lan Wu<sup>\*a</sup>, Xiandeng Hou<sup>a, b</sup>

<sup>a</sup>Analytical & Testing Center, Sichuan University, Chengdu, Sichuan 610064, China

<sup>b</sup>College of Chemistry, Sichuan University, Chengdu, 610064, China

\*Corresponding author: [wulan@scu.edu.cn](mailto:wulan@scu.edu.cn)

**Table S1.** GPC results of chitosan

| Mn                    | Mw                    | Mp                    | Mz                    | Mw/Mn | Mz/Mw |
|-----------------------|-----------------------|-----------------------|-----------------------|-------|-------|
| 1.442×10 <sup>6</sup> | 1.632×10 <sup>6</sup> | 1.130×10 <sup>6</sup> | 2.120×10 <sup>6</sup> | 1.131 | 1.299 |

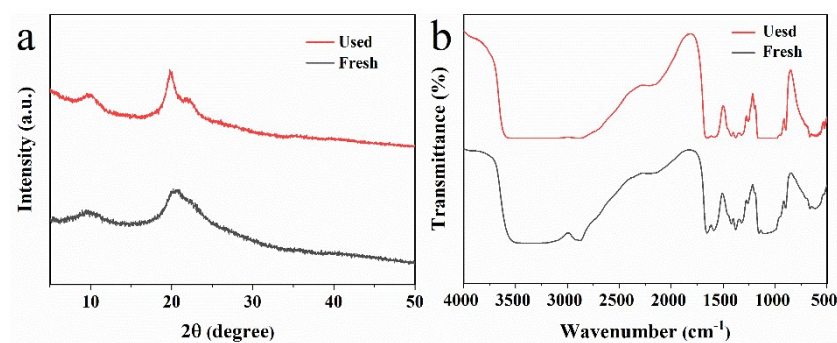

**Fig. S1** (a) XRD patterns and (b) FT-IR spectra of CSM before and after 5 cycles (the CSM was washed with 2 wt% NaOH after each degradation cycle).

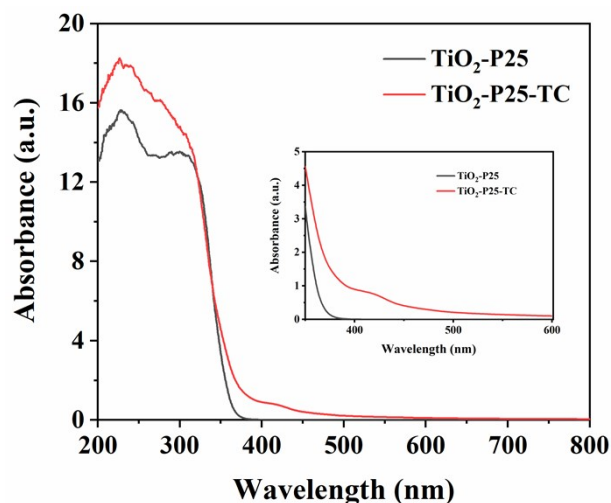

**Fig. S2** UV-vis diffused reflectance spectrum of TiO<sub>2</sub>-P25 before and after the adsorption of 50mg/L TC solution for 1 h

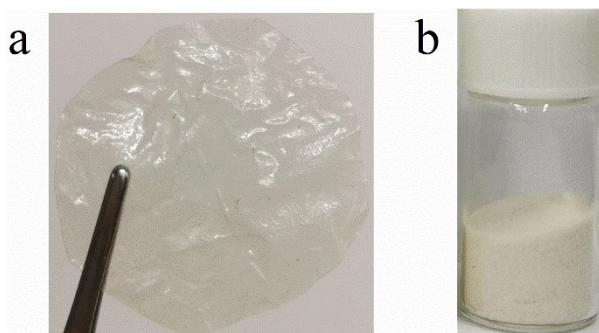

**Fig. S3** Pictures of CSM (a) and CSP (b) used in this work.

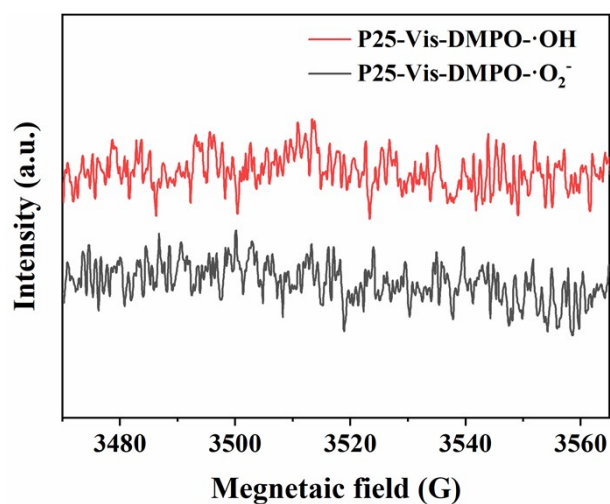

**Fig. S4** ESR spectrum of DMPO-·O<sub>2</sub><sup>-</sup> and DMPO-·OH of TiO<sub>2</sub>-P25 (light source: 300 W xenon lamp (PLS-SXE300) equipped with a 400 nm cut-off filter, solvent to capture to capture ·O<sub>2</sub><sup>-</sup>: 1 mL methanol+10 μL DMPO, solvent to capture to capture ·OH: 1 mL H<sub>2</sub>O+10 μL DMPO, illumination time: 3 min)

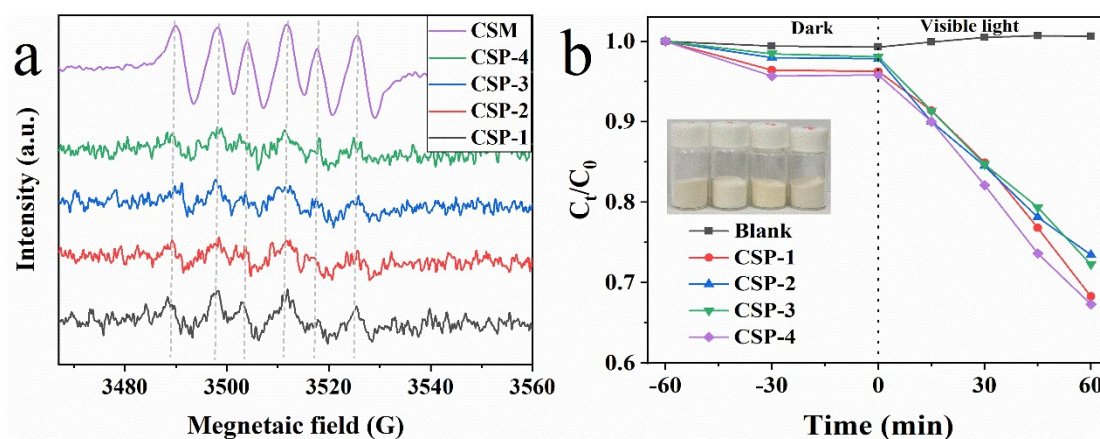

**Fig. S5** (a) EPR spectrum of DMPO-•O<sub>2</sub><sup>-</sup> of CS samples (light source: 300 W xenon lamp (PLS-SXE300) equipped with a 400 nm cut-off filter, solvent: 1 mL methanol+10  $\mu$ L DMPO, illumination time: 5 min); (b) Photocatalytic degradation curves of TC by CS samples (light source: 300 W xenon lamp (PLS-SXE300) equipped with a 400 nm cut-off filter, dosage: 50 mg, TC solution: 50 mL 50 mg/L)

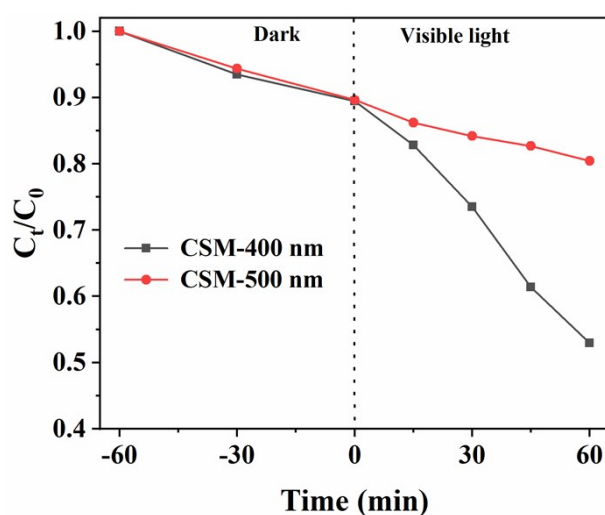

**Fig. S6** Photocatalytic degradation of TC by CSM at a single wavelength of 400 and 500 nm.
